# Supplementary material for: The Matricellular Protein Hevin Is Involved in Alcohol Use Disorder
Source: MDPI journal article supplement (doi:10.3390/biom13020234), 2023-01-25
Supplement: s1 [file s1]

**Supplementary Table S1.** Demographic characteristics, postmortem delay (PMD), storage time of the sample, cause of death, psychiatric diagnosis and toxicological findings of the subjects included in the study. AUD, alcohol use disorder; C, control; D, depression; M, male; F, female; CRF, cardiorespiratory failure.

| Case  | Sex | Age (Years) | PMD (Hours) | Storage Time (Months) | Cause of Dead              | Psychiatric Diagnosis | Drugs in Blood               |
|-------|-----|-------------|-------------|-----------------------|----------------------------|-----------------------|------------------------------|
| AUD1  | M   | 59          | 22          | 11                    | Natural/ Cirrhosis         | AUD                   | (-)                          |
| C1    | M   | 57          | 3           | 18                    | Accident/ Crushing         | Control               | (-)                          |
| D1    | M   | 55          | 20          | 95                    | Suicide/ Train             | Depression            | Antidepressants              |
| AUD2  | M   | 59          | 19          | 159                   | Natural/ CRF               | AUD                   | (-)                          |
| C2    | M   | 58          | 16          | 201                   | Accident/ Traffic          | Control               | (-)                          |
| D2    | M   | 60          | 18          | 170                   | Suicide/ Hanging           | Depression            | Antidepressants              |
| AUD3  | M   | 61          | 34          | 20                    | Natural/ CRF               | AUD                   | Ethanol                      |
| C3    | M   | 62          | 9           | 45                    | Natural/ CRF               | Control               | (-)                          |
| D3    | M   | 62          | 15          | 96                    | Suicide/ Knife             | Depression            | Antidepressants              |
| AUD4  | M   | 51          | 23          | 23                    | Natural/ CRF               | AUD                   | (-)                          |
| C4    | M   | 51          | 14          | 108                   | Accident/ Traffic          | Control               | Ethanol                      |
| D4    | M   | 51          | 24          | 200                   | Suicide/ Hanging           | Depression            | Antidepressants              |
| AUD5  | M   | 55          | 11          | 36                    | Natural/ CRF               | AUD                   | (-)                          |
| C5    | M   | 56          | 13          | 96                    | Natural/ CRF               | Control               | (-)                          |
| D5    | M   | 56          | 3           | 128                   | Natural/ Thromboembolism   | Depression            | Antidepressants              |
| AUD6  | M   | 61          | 27          | 162                   | Natural/ CRF               | AUD                   | (-)                          |
| C6    | M   | 61          | 23          | 202                   | Accident/ Traffic          | Control               | (-)                          |
| D6    | M   | 60          | 24          | 111                   | Suicide/ Jumping           | Depression            | Antidepressants              |
| AUD7  | M   | 52          | 17          | 85                    | Natural/ CRF               | AUD                   | (-)                          |
| C7    | M   | 54          | 16          | 112                   | Accident/ Work             | Control               | (-)                          |
| D7    | M   | 50          | 23          | 143                   | Suicide/ Gun               | Depression            | Antidepressants              |
| AUD8  | M   | 47          | 28          | 88                    | Natural/ Hemorrhage        | AUD                   | Ethanol                      |
| C8    | M   | 46          | 24          | 129                   | Natural/CRF                | Control               | (-)                          |
| D8    | M   | 49          | 27          | 18                    | Natural/CRF                | Depression            | Antidepressants              |
| AUD9  | F   | 50          | 14          | 95                    | Natural/ Hemorrhage        | AUD                   | Ethanol                      |
| C9    | F   | 50          | 10          | 129                   | Natural/CRF                | Control               | (-)                          |
| D9    | F   | 49          | 19          | 164                   | Suicide/ Jumping           | Depression            | Antidepressants              |
| AUD10 | F   | 38          | 22          | 165                   | Natural/ CRF               | AUD                   | (-)                          |
| C10   | F   | 36          | 20          | 123                   | Accident/ Train            | Control               | (-)                          |
| D10   | F   | 36          | 32          | 152                   | Suicide/ Drug intoxication | Depression            | Anxiolytics/ Antidepressants |
| AUD11 | F   | 71          | 16          | 125                   | Natural/ CRF               | AUD                   | (-)                          |
| C11   | F   | 71          | 22          | 155                   | Accident/ Traffic          | Control               | (-)                          |
| D11   | F   | 70          | 7           | 92                    | Suicide/ Jumping           | Depression            | Antidepressants              |
| AUD12 | M   | 64          | 9           | 104                   | Natural/ CRF               | AUD                   | Ethanol                      |
| C12   | M   | 64          | 22          | 46                    | Natural/ CRF               | Control               | (-)                          |
| D12   | M   | 65          | 12          | 145                   | Suicide/ Hanging           | Depression            | Antidepressants              |
| AUD13 | M   | 73          | 2           | 168                   | Natural/ CRF               | AUD                   | Ethanol                      |
| C13   | M   | 73          | 10          | 202                   | Accident/ Jumping          | Control               | (-)                          |
| D13   | M   | 73          | 11          | 39                    | Suicide/ Hanging           | Depression            | Antidepressants              |
| AUD14 | M   | 52          | 27          | 114                   | Natural/ CRF               | AUD                   | (-)                          |
| C14   | M   | 51          | 19          | 101                   | Accident/ Traffic          | Control               | (-)                          |
| D14   | M   | 53          | 22          | 87                    | Suicide/ Hanging           | Depression            | Antidepressants              |
| AUD15 | M   | 49          | 10          | 115                   | Natural/ CRF               | AUD                   | Ethanol                      |
| C15   | M   | 48          | 10          | 123                   | Natural/CRF                | Control               | (-)                          |
| D15   | M   | 50          | 24          | 118                   | Suicide/ Gun               | Depression            | Antidepressants              |
| AUD16 | M   | 56          | 24          | 129                   | Natural/ CRF               | AUD                   | Ethanol                      |
| C16   | M   | 55          | 22          | 130                   | Natural/CRF                | Control               | (-)                          |

|              |        |      |      |        |                               |            |                                 |
|--------------|--------|------|------|--------|-------------------------------|------------|---------------------------------|
| <i>D16</i>   | M      | 56   | 22   | 119    | Suicide/ Gun                  | Depression | Antidepressants                 |
| <i>AUD17</i> | F      | 54   | 7    | 142    | Natural/ CRF                  | AUD        | Ethanol                         |
| <i>C17</i>   | F      | 51   | 10   | 84     | Natural/CRF                   | Control    | (-)                             |
| <i>D17</i>   | F      | 54   | 18   | 169    | Suicide/ Hanging              | Depression | Antidepressants                 |
| <i>AUD18</i> | M      | 60   | 6    | 143    | Natural/ CRF                  | AUD        | (-)                             |
| <i>C18</i>   | M      | 60   | 19   | 87     | Natural/ CRF                  | Control    | (-)                             |
| <i>D18</i>   | M      | 61   | 5    | 198    | Natural/ Aneurism             | Depression | Antidepressants                 |
| <i>AUD19</i> | M      | 46   | 11   | 149    | Natural/<br>Hemorrhage        | AUD        | (-)                             |
| <i>C19</i>   | M      | 47   | 17   | 205    | Natural/ CRF                  | Control    | (-)                             |
| <i>D19</i>   | M      | 47   | 18   | 167    | Suicide/ Hanging              | Depression | Antidepressants                 |
| <i>AUD20</i> | F      | 44   | 11   | 163    | Natural/ CRF                  | AUD        | (-)                             |
| <i>C20</i>   | F      | 45   | 12   | 130    | Natural/ CRF                  | control    | (-)                             |
| <i>D20</i>   | F      | 43   | 24   | 143    | Natural/CRF                   | Depression | Antidepressants                 |
| <i>AUD21</i> | M      | 53   | 25   | 158    | Natural/ CRF                  | AUD        | (-)                             |
| <i>C21</i>   | M      | 54   | 23   | 159    | Accident/ Jumping             | control    | (-)                             |
| <i>D21</i>   | M      | 53   | 39   | 191    | Suicide/ Gun                  | Depression | Antidepressants                 |
| <i>AUD22</i> | M      | 65   | 5    | 159    | Natural/ CRF                  | AUD        | Ethanol                         |
| <i>C22</i>   | M      | 67   | 22   | 166    | Natural/ CRF                  | control    | (-)                             |
| <i>D22</i>   | M      | 65   | 11   | 94     | Suicide/ Drug<br>intoxication | Depression | Anxiolytics/<br>Antidepressants |
| <i>AUD23</i> | F      | 50   | 23   | 159    | Natural/ CRF                  | AUD        | Ethanol                         |
| <i>C23</i>   | F      | 45   | 8    | 21     | Natural/<br>Hemorrhage        | Control    | (-)                             |
| <i>D23</i>   | F      | 49   | 18   | 142    | Suicide/<br>Submersion        | Depression | Antidepressants                 |
| <i>AUD24</i> | M      | 57   | 17   | 147    | Natural/ CRF                  | AUD        | (-)                             |
| <i>C24</i>   | M      | 55   | 20   | 37     | Accident/ Mountain            | Control    | (-)                             |
| <i>D24</i>   | M      | 57   | 21   | 92     | Suicide/ Jumping              | Depression | Antidepressants                 |
| <i>AUD25</i> | F      | 46   | 19   | 156    | Natural/ CRF                  | AUD        | Ethanol                         |
| <i>C25</i>   | F      | 43   | 3    | 40     | Accident/ Traffic             | Control    | (-)                             |
| <i>D25</i>   | F      | 45   | 21   | 89     | Suicide/ Hanging              | Depression | Antidepressants                 |
| <i>AUD</i>   | 7F/18M | 55±2 | 17±2 | 119±10 |                               |            |                                 |
| <i>C</i>     | 7F/18M | 54±2 | 15±1 | 114±12 |                               |            |                                 |
| <i>D</i>     | 7F/18M | 55±2 | 19±2 | 127±9  |                               |            |                                 |

**Supplementary Table S2.** Details of the primary and secondary antibodies used in western blot assays. PFC, prefrontal cortex; HIP, hippocampus; CAU, caudate nucleus; CB, cerebellum; FC, frontal cortex; NAc, nucleus accumbens; CPU, dorsal striatum; AMY, amygdala.

| Sample                                                 | Primary Ab                                        | Primary Ab Dilution | Secondary Ab                                                             | Secondary Ab Dilution |
|--------------------------------------------------------|---------------------------------------------------|---------------------|--------------------------------------------------------------------------|-----------------------|
| <b>Human brain (PFC, HIP, CAU, CB)</b>                 | Goat anti-human hevin (R&D systems, AF2728)       | 1:3000              | Alexa Fluor® 680 conjugated donkey anti-goat (Life Technologies, A21084) | 1:5000                |
|                                                        | Mouse anti- $\beta$ -actin (Sigma-Aldrich, A1978) | 1:100.000           | DyLight™ 800 conjugated donkey anti-mouse (Rockland, 610-745-002)        | 1:5000                |
| <b>Mouse brain (FC, NAc, CPu, HIP, AMY) and plasma</b> | Goat anti-mouse hevin (R&D systems, AF2836)       | 1:2000              | Alexa Fluor® 680 conjugated donkey anti-goat (Life Technologies, A21084) | 1:5000                |
|                                                        | Rabbit anti- $\beta$ -actin (Abcam, Ab8227)       | 1:5000              | DyLight™ 800 conjugated donkey anti-rabbit (Rockland, 611-745-127)       | 1:5000                |
